# Supplementary material for: Impact of a group-based intervention program on physical activity and health-related outcomes in worksite settings
Source: Springer Nature journal article supplement (doi:10.1186/s12889-020-09036-2), 2020-06-15
Supplement: MOESM1 [file 18084416]

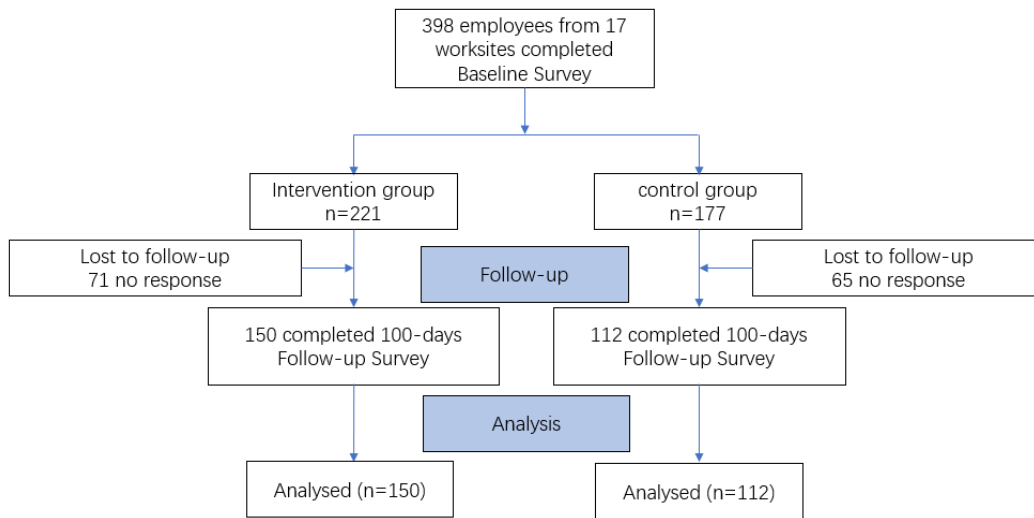

CONSORT diagram of participants flow through this program
