# Supplementary material for: Impact of a group-based intervention program on physical activity and health-related outcomes in worksite settings
Source: Springer Nature journal article supplement (doi:10.1186/s12889-020-09036-2), 2020-06-15
Supplement: MOESM2 [file 18084416]

Table S1. Comparison of demographic characteristics of follow-up and lost

|                                        | follow-up | lost     | <i>p</i> |
|----------------------------------------|-----------|----------|----------|
|                                        | n=260     | n=136    |          |
|                                        | n (%)     | n (%)    |          |
| <b>Gender</b>                          |           |          |          |
| Male                                   | 146(55.7) | 80(58.8) | >0.05    |
| Female                                 | 116(44.3) | 56(41.2) |          |
| <b>Age (years)</b>                     |           |          |          |
| 18-29                                  | 54(20.6)  | 39(28.7) | >0.05    |
| 30-39                                  | 99(37.8)  | 46(33.8) |          |
| 40-49                                  | 78(29.8)  | 36(26.5) |          |
| ≥50                                    | 31(11.8)  | 15(11.0) |          |
| <b>Marital status</b>                  |           |          |          |
| Married                                | 184(70.2) | 89(65.4) | >0.05    |
| Unmarried/Divorced                     | 78(29.8)  | 47(34.6) |          |
| /widowed                               |           |          |          |
| <b>Education</b>                       |           |          |          |
| High School/technical secondary school | 42(16.0)  | 18(13.2) | >0.05    |
| Junior college                         | 84(32.1)  | 32(23.5) |          |
| Bachelor                               | 107(40.8) | 61(44.9) |          |
| Masters/Doctorate                      | 29(11.1)  | 25(18.4) |          |
| Overall                                | 262(100)  | 136(100) |          |

Table S2. Scoring rules for individuals

| Items                                                                        | Score |
|------------------------------------------------------------------------------|-------|
| <b>① Daily steps</b>                                                         |       |
| 6,000-7,999                                                                  | 1     |
| 8,000-9,999                                                                  | 2     |
| ≥10,000                                                                      | 3     |
| <b>② Walking prescription (pace at 100-150 steps/minute)</b>                 |       |
| completing the first prescription (lasts 10 minutes)                         | 1     |
| completing the first two prescriptions (each lasts 10 minutes)               | 3     |
| completing three prescriptions (the third lasts 15 minutes)                  | 6     |
| <b>③ Completing 3,000 steps in 05:00-09:00 or 4,000 steps in 17:00-23:00</b> | 1     |
